# Supplementary material
Source: MDPI journal article supplement (https://www.mdpi.com/2073-4441/15/2/245)
Supplement: s1 [file s1 › water-2068155-supplementary.pdf]

## Supplementary Materials

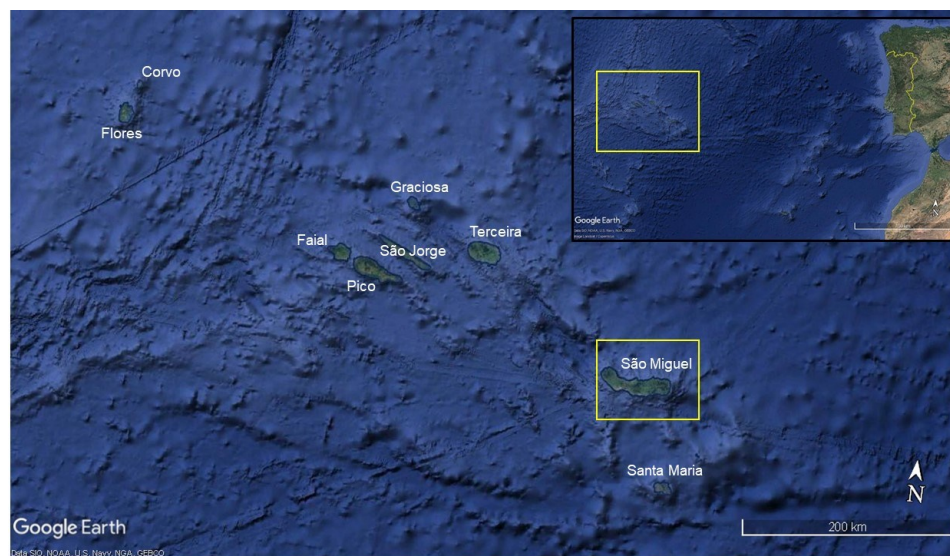

**Figure S1.** Location of the Azores archipelago and São Miguel Island along the North-Atlantic Ocean.

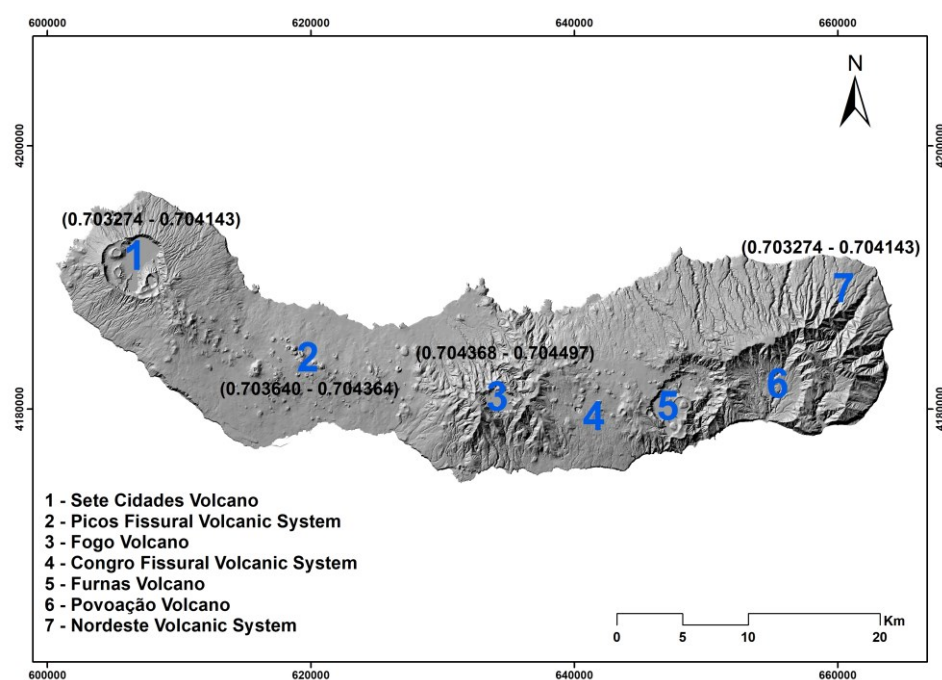

**Figure S2.** Map of São Miguel Island showing the major volcanic units according to Gaspar *et al.* (2015) and the  $^{87}\text{Sr}/^{86}\text{Sr}$  values (data from Beier *et al.*, 2007).
